# Supplementary material for: Multi-responsive graft copolymer micelles comprising acetal and disulfide linkages for stimuli-triggered drug delivery
Source: Royal Society of Chemistry journal article supplement (doi:10.1039/c5tb00473j), 2015-01-01
Supplement: c5tb00473j1.pdf [file c5tb00473j1.pdf]

## Supporting Information

# Multi-responsive graft copolymer micelles comprising acetal and disulfide linkages for stimuli-triggered drug delivery

Huanhuan Liu, Cangxia Li, Dandan Tang, Xiaonan An, Yanfei Guo and Youliang Zhao\*

Suzhou Key Laboratory of Macromolecular Design and Precision Synthesis, Jiangsu Key Laboratory of Advanced Functional Polymer Design and Application, College of Chemistry, Chemical Engineering and Materials Science, Soochow University, Suzhou 215123, China

**Table S1.** Dependence of apparent drug-release rate ( $K$ ), cumulative release (CR) and increment of cumulative release (ICR) at 48 h on external stimuli during in vitro DOX releases from G3 aggregates or G3/ $\beta$ -CD coaggregates

| Aggregates      | T (°C) | pH  | DTT  | $K$ (h <sup>-1</sup> ) | CR (%) | ICR (%) |
|-----------------|--------|-----|------|------------------------|--------|---------|
| G3              | 25     | 7.4 | none | 0.063                  | 36.1   | 0       |
| G3              | 25     | 5.3 | yes  | 0.174                  | 59.9   | 65.9    |
| G3              | 37     | 7.4 | none | 0.158                  | 48.3   | 33.8    |
| G3              | 37     | 7.4 | yes  | 0.238                  | 67.4   | 86.7    |
| G3              | 37     | 5.3 | none | 0.278                  | 63.0   | 74.5    |
| G3              | 37     | 5.3 | yes  | 0.403                  | 77.1   | 114     |
| G3/ $\beta$ -CD | 25     | 7.4 | none | 0.139                  | 45.4   | 0       |
| G3/ $\beta$ -CD | 25     | 5.3 | yes  | 0.178                  | 61.8   | 36.1    |
| G3/ $\beta$ -CD | 37     | 7.4 | none | 0.236                  | 52.4   | 15.4    |
| G3/ $\beta$ -CD | 37     | 7.4 | yes  | 0.325                  | 64.4   | 41.9    |
| G3/ $\beta$ -CD | 37     | 5.3 | none | 0.293                  | 67.2   | 48.0    |
| G3/ $\beta$ -CD | 37     | 5.3 | yes  | 0.458                  | 78.6   | 73.1    |

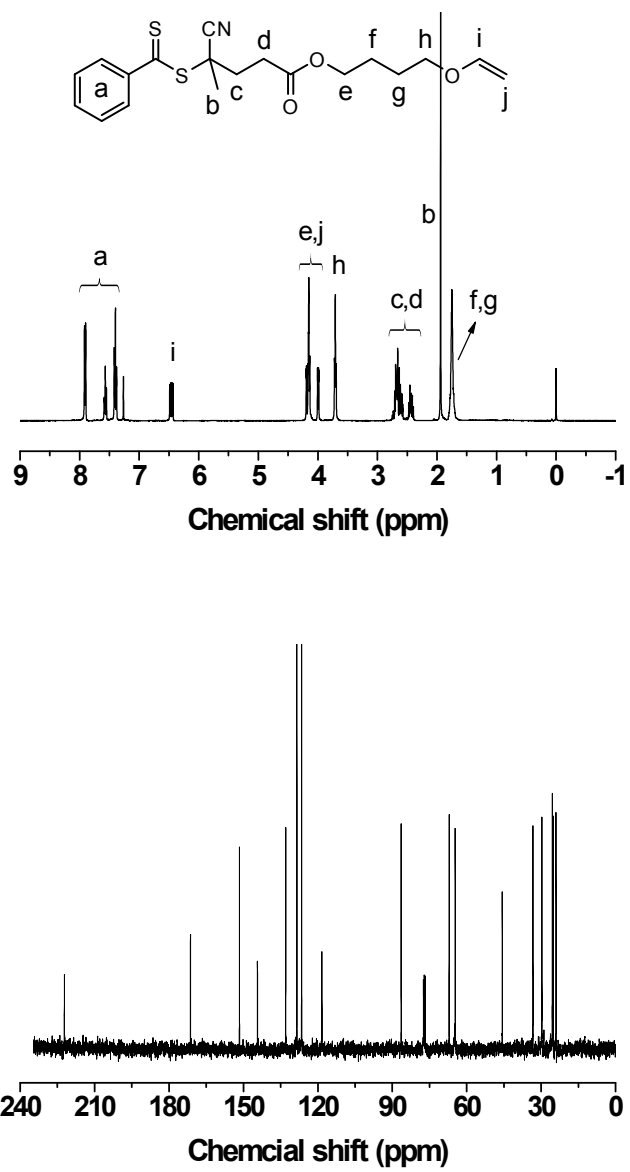

**Fig. S1**  $^1\text{H}$  (top) and  $^{13}\text{C}$  (bottom) NMR spectra of VCP.

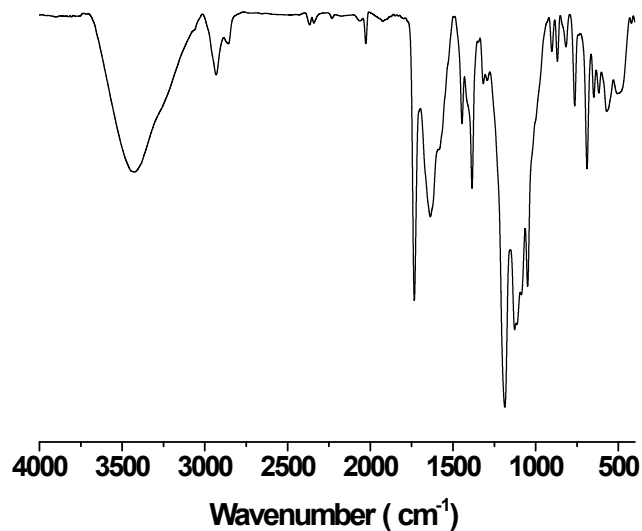

Fig. S2 IR spectrum of 4-(vinylloxy)butyl 4-cyano-4-(phenylcarbonothioylthio)pentanoate (VCP).

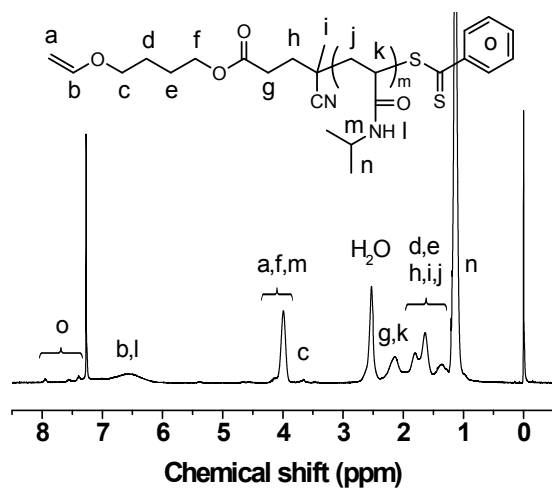

Fig. S3  $^1\text{H}$  NMR spectrum of vinylloxy-terminated PNIPAM.

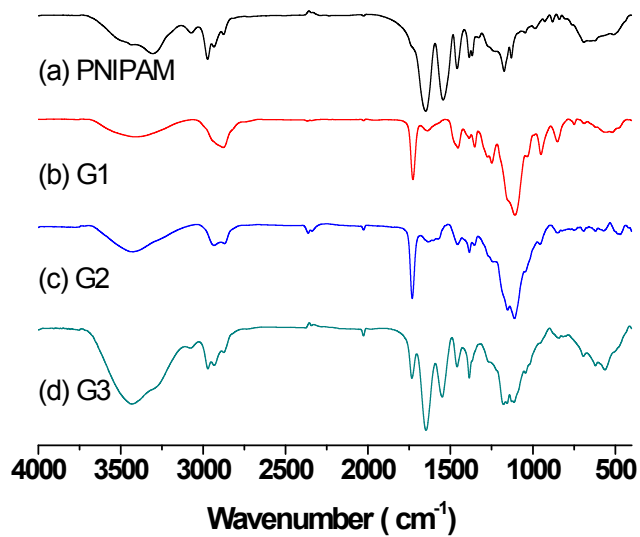

**Fig. S4** IR spectra of PNIPAM (a), poly(HEMA-*co*-PEGMEMA) (G1, b), poly(PEG-*co*-PCL) (G2, c), and poly(PEG-*co*-PCL)-*graft*-PNIPAM (G3, d).

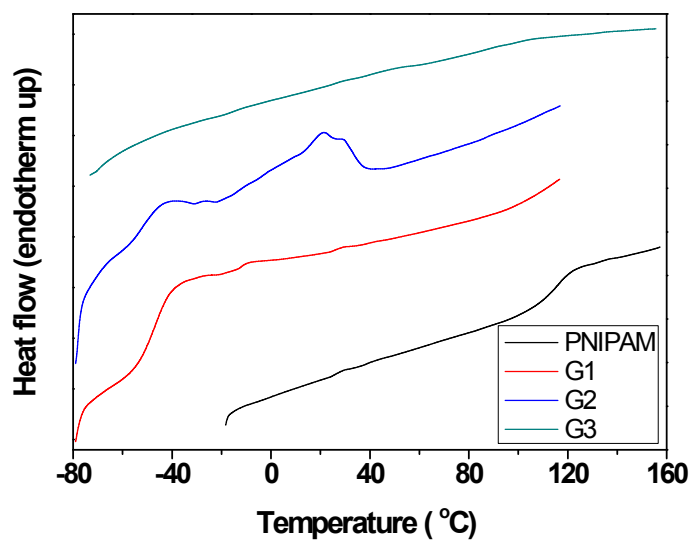

**Fig. S5** DSC traces of various polymers.

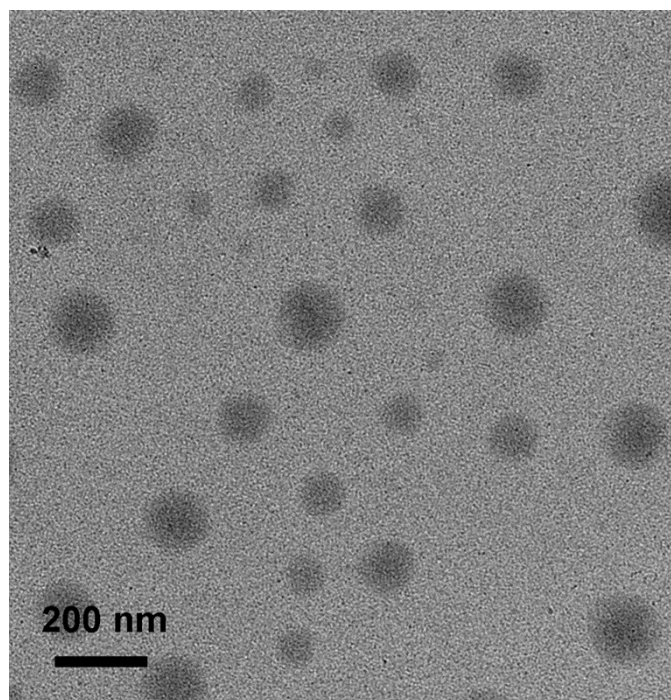

**Fig. S6** TEM image of G3/ $\beta$ -CD coaggregates ( $c_{\text{polymer}} = 0.50 \text{ mg mL}^{-1}$ ,  $c_{\beta\text{-CD}} = 1.0 \text{ mM}$ ) formed at 37 °C.

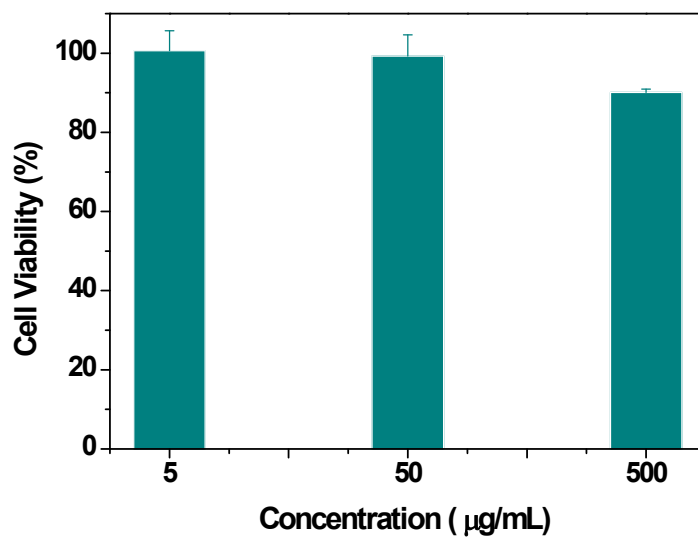

**Fig. S7** Cell viability of 4T1 cells incubated with  $\beta$ -CD aqueous solution at various concentrations at 37 °C for 24 h. Error bars denote standard deviations from three parallel trials.

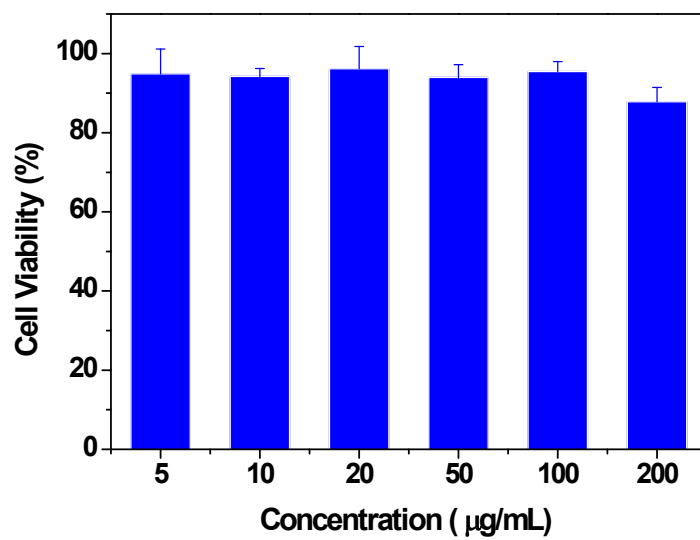

**Fig. S8** Cell viability of 4T1 cells incubated with G3 aggregates at various concentrations at 37 °C for 24 h. Error bars denote standard deviations from three parallel trials.
